# Supplementary material
Source: publisher figshare collection journal article supplement (https://gsajournals.figshare.com/ndownloader/files/13529333)
Supplement: Supplementary file 1 [file 13529333]

## Sheet: Sheet1
S4 File: Haplotype similarity between FN-2-9-04, CB46-Null and CB46 at the Rk locus. The root-knot nematode resistance mapped on Vu04 in FN-2-9-04 was detected with high likelihood, -logp = 20, which is higher than the thrseshold of significance, -logp =4.8. This genomic region corresponds to the peak of the QTL.
SNP = single nucleotide polymorphism; Vu = chromosome; cMps = population specific map in centiMorgan;
cMcm = cowpea consensus genetic map in centiMorgan; Physp = physical position on the cowpea pseudomolecules in base pairs;
SNP	Vu	cMps	cMcm	Physp (bp)	(-)logp (4.8)	FN-2-9-04	CB46-Null	CB46	FN-2-9-04/CB46-Null	FN-2-9-04/CB46	CB46-Null/CB46
2_44685	4	24.668	13.524	3141521	20	CC	TT	TT	0	0	1
2_27063	4	24.668	13.524	3161612	20	TT	CC	CC	0	0	1
2_06281	4	24.668	13.524	3161897	20	CC	TT	TT	0	0	1
2_37020	4	24.668	13.524	3165970	20	GG	AA	AA	0	0	1
2_29604	4	24.668	13.524	3166053	20	CC	AA	AA	0	0	1
2_20950	4	24.668	13.524	3177462	20	TT	CC	CC	0	0	1
2_09970	4	24.668	13.524	3179499	20	CC	TT	TT	0	0	1
2_09969	4	24.668	13.524	3179810	20	TT	CC	CC	0	0	1
2_23989	4	24.668	13.524	3186689	20	AA	GG	GG	0	0	1
2_54998	4	24.668	13.524	3188895	20	GG	AA	AA	0	0	1
2_10811	4	24.668	13.524	3198630	20	CC	TT	TT	0	0	1
2_31168	4	24.668	13.524	3215116	20	TT	GG	GG	0	0	1
2_19505	4	24.668	13.524	3242763	20	AA	GG	GG	0	0	1
2_48582	4	24.668	#N/A	3245764	20	GG	CC	GG	0	1	0
2_09077	4	24.668	13.524	3258498	20	GG	AA	AA	0	0	1
2_16069	4	24.668	13.524	3266134	20	AA	GG	GG	0	0	1
2_16068	4	24.668	13.524	3267097	20	TT	CC	CC	0	0	1
2_24899	4	24.668	13.524	3272235	20	TT	CC	CC	0	0	1
2_23990	4	25.088	13.524	3187553	12.6713	CC	AA	AA	0	0	1
2_05693	4	25.508	13.524	3403521	20	CC	TT	CC	0	1	0
2_06769	4	25.928	13.524	3278892	20	CC	TT	CC	0	1	0
2_10154	4	25.928	13.524	3296352	20	AA	GG	GG	0	0	1
2_10155	4	25.928	13.524	3296701	20	TT	GG	GG	0	0	1
2_23782	4	25.928	13.524	3306492	20	CC	TT	CC	0	1	0
2_23783	4	25.928	13.524	3307244	20	CC	AA	CC	0	1	0
2_23784	4	25.928	13.524	3307558	20	CC	AA	CC	0	1	0
2_30142	4	25.928	13.524	3311050	20	TT	CC	TT	0	1	0
2_10985	4	25.928	13.524	3330551	20	CC	TT	CC	0	1	0
2_45120	4	25.928	13.524	3332906	20	TT	CC	TT	0	1	0
2_06792	4	25.928	13.524	3335635	20	CC	TT	CC	0	1	0
2_41736	4	25.928	13.524	3353915	20	AA	CC	AA	0	1	0
2_13573	4	25.928	13.524	3392386	20	TT	GG	TT	0	1	0
2_13574	4	25.928	13.524	3393371	20	GG	AA	GG	0	1	0
2_05691	4	25.928	13.524	3403047	20	GG	TT	GG	0	1	0
2_50962	4	25.928	13.524	3443387	20	GG	TT	TT	0	0	1
2_20159	4	25.928	13.524	3444089	20	TT	CC	CC	0	0	1
2_20160	4	25.928	13.524	3444728	20	TT	CC	CC	0	0	1
2_43611	4	25.928	13.524	NA	20	CC	AA	CC	0	1	0
2_08886	4	26.348	14.0786	3473224	20	GG	TT	TT	0	0	1
2_17894	4	26.348	14.0786	3476199	20	GG	AA	AA	0	0	1
2_00697	4	26.348	#N/A	3518057	20	CC	TT	CC	0	1	0
2_14101	4	26.348	#N/A	3521786	20	AA	GG	AA	0	1	0
2_14102	4	26.348	#N/A	3522048	20	CC	TT	CC	0	1	0
2_07238	4	26.348	15.1135	3542855	20	TT	CC	CC	0	0	1
2_50198	4	26.348	15.1135	3594734	20	TT	CC	CC	0	0	1
2_05175	4	26.348	15.1135	3626034	20	AA	CC	AA	0	1	0
2_15390	4	27.189	15.1135	3663799	20	CC	TT	CC	0	1	0
2_15391	4	27.189	15.1135	3664866	20	TT	CC	TT	0	1	0
2_33955	4	27.189	15.1135	3692702	20	GG	CC	GG	0	1	0
2_28696	4	27.609	15.2795	3853623	20	GG	TT	TT	0	0	1
2_25464	4	27.609	15.2795	3855960	20	CC	AA	AA	0	0	1
2_02272	4	27.609	15.2795	3857769	20	GG	AA	AA	0	0	1
2_02270	4	27.609	15.2795	3858989	20	CC	TT	TT	0	0	1
2_10909	4	27.609	15.2795	3866166	20	CC	TT	TT	0	0	1
2_45683	4	27.609	15.2795	3888104	20	TT	CC	CC	0	0	1
2_14591	4	27.609	15.2795	3893049	20	TT	CC	CC	0	0	1
2_48094	4	27.609	15.2795	3903899	20	GG	AA	AA	0	0	1
2_06268	4	27.609	15.2795	3909949	20	TT	CC	CC	0	0	1
2_54825	4	27.609	15.2795	3915729	20	CC	AA	AA	0	0	1
2_47275	4	27.609	15.2795	3918987	20	AA	GG	GG	0	0	1
2_42835	4	27.609	15.2795	3929855	20	TT	GG	GG	0	0	1
2_01103	4	27.609	15.2795	3961076	20	AA	GG	GG	0	0	1
2_40717	4	27.609	15.1135	3989200	20	AA	CC	CC	0	0	1
2_49621	4	27.609	15.1135	4065346	20	GG	AA	GG	0	1	0
2_29161	4	27.609	15.1135	4075546	20	GG	TT	GG	0	1	0
1_1338	4	27.609	15.1135	4121865	20	AA	TT	--	0	0	0
2_30930	4	27.609	15.1135	4127983	20	TT	GG	TT	0	1	0
2_19443	4	27.609	15.5109	4128335	20	CC	TT	CC	0	1	0
2_18980	4	27.609	16.0655	4138458	20	GG	AA	AA	0	0	1
2_10583	4	27.609	15.1135	#N/A	20	CC	AA	CC	0	1	0
Total						70	70	70	0	27	42
%Similarity									0	38.5714	60
Rk locus (Huynh et al., 2016)			6.76	15.114	8.354	cM
Rk overlap with resistance in FN-2-9-04 on Vu04			13.524	15.114	1.59	cM
			24.668	27.609	2.941	cM
			3141521	4138458	996937	bp
